# Supplementary material for: Acid-switchable nanoparticles induce self-adaptive aggregation for enhancing antitumor immunity of natural killer cells
Source: PubMed Central journal article supplement — Acta Pharm Sin B. 2023 Feb 8;13(7):3093–105. doi: 10.1016/j.apsb.2023.02.002 (PMC10373095; doi:10.1016/j.apsb.2023.02.002), 2023-02-08
Supplement: mmc1.pdf [file mmc1.pdf]

## Supporting Information for

### ORIGINAL ARTICLE

# Acid-switchable nanoparticles induce self-adaptive aggregation for enhancing antitumor immunity of natural killer cells

Xiangshi Sun<sup>a,b</sup>, Xiaoxuan Xu<sup>b</sup>, Jue Wang<sup>b</sup>, Xinyue Zhang<sup>f</sup>, Zitong Zhao<sup>b</sup>, Xiaochen Liu<sup>b</sup>, Guanru Wang<sup>b</sup>, Lesheng Teng<sup>d</sup>, Xia Chen<sup>a,\*</sup>, Dangge Wang<sup>b,c,\*</sup>, Yaping Li<sup>b,e,f,\*</sup>

<sup>a</sup>*Department of Pharmacology, College of Basic Medical Sciences, Jilin University, Changchun 130021, China*

<sup>b</sup>*State Key Laboratory of Drug Research & Center of Pharmaceutics, Shanghai Institute of Materia Medica, Chinese Academy of Sciences, Shanghai 201203, China*

<sup>c</sup>*Yantai Key Laboratory of Nanomedicine & Advanced Preparations, Yantai Institute of Materia Medica, Yantai 264000, China*

<sup>d</sup>*School of Life Sciences, Jilin University, Changchun 130012, China*

<sup>e</sup>*Shandong Laboratory of Yantai Drug Discovery, Bohai Rim Advanced Research Institute for Drug Discovery, Yantai 264000, China*

<sup>f</sup>*School of Chinese Materia Medica, Nanjing University of Chinese Medicine, Nanjing 210023, China*

Received 19 October 2022; received in revised form 30 December 2022; accepted 16 January 2023

\*Corresponding authors.

E-mail addresses: chenxjluedu@163.com (Xia Chen), dgwang@simm.ac.cn (Dangge Wang), ypli@simm.ac.cn (Yaping Li).

**Table S1** Composition of control and treated nanoparticles.

| Need heading | NaAlg | CaCO <sub>3</sub> | Galunisertib | IL-15 |
|--------------|-------|-------------------|--------------|-------|
| Gal/IL-15    |       |                   | √            | √     |
| Gal/IL-15@Ca |       | √                 | √            | √     |
| Gal@CaLN     | √     | √                 | √            |       |
| IL-15@CaLN   | √     | √                 |              | √     |
| Gal/IL-15@LN | √     |                   | √            | √     |

Gal/IL-15@CaLN                   √                   √                   √                   √

---

**Table S2** Encapsulation efficiency (EE) and loading capability (LC) of galunisertib and IL-15 of Gal/IL-15@CaLN and Gal/IL-15@LN. Data were expressed as mean ± SD (*n* = 3).

|              |       | Gal/IL-15@CaLN       | Gal/IL-15@LN         |
|--------------|-------|----------------------|----------------------|
| Galunisertib | EE(%) | 77.9 ± 0.2           | 81.6 ± 0.1           |
|              | LC(%) | 4.3 ± 0.01           | 4.5 ± 0.01           |
| IL-15        | EE(%) | 88.0 ± 1.6           | 91.9 ± 1.4           |
|              | LC    | 0.98 ± 0.02 µg/10 mg | 1.02 ± 0.02 µg/10 mg |

## Figures

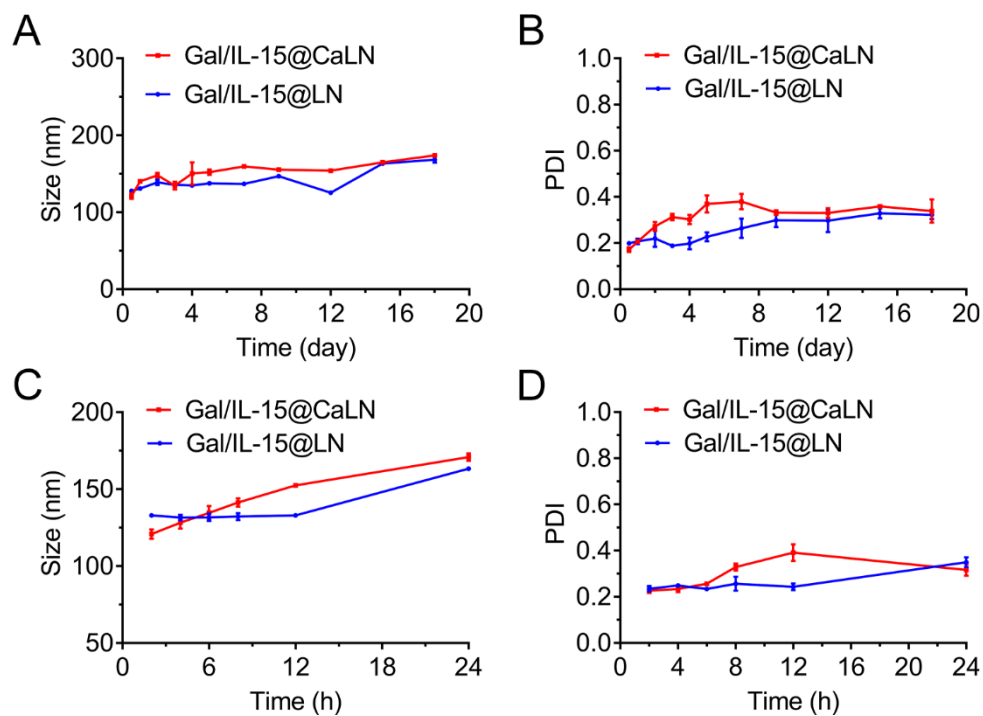

**Figure S1** (A) Hydrodynamic size and (B) PDI of Gal/IL-15@CaLN and Gal/IL-15@LN after dispersed in PBS for desired duration. (C) Hydrodynamic size and (D) PDI of Gal/IL-15@CaLN and Gal/IL-15@LN in PBS with 10% FBS. Data were expressed as mean  $\pm$  SD ( $n = 3$ ).

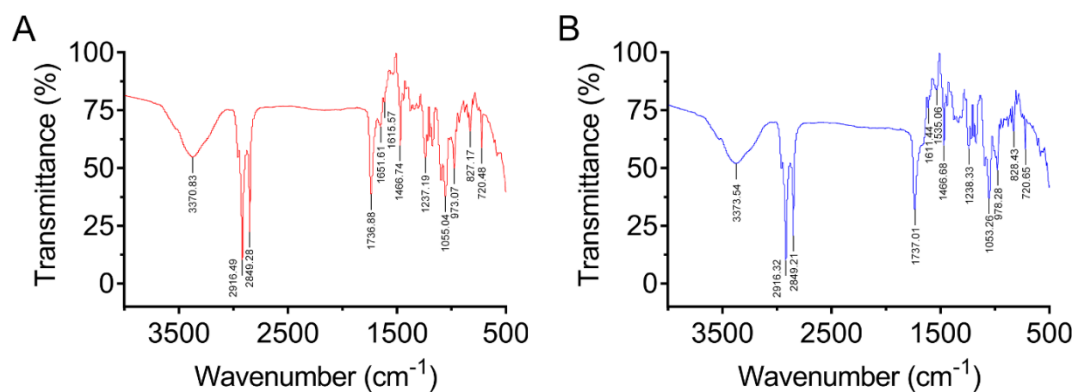

**Figure S2** FTIR spectrum of (A) Gal/IL-15@CaLN, (B) Gal/IL-15@CaLN in acidic buffer.

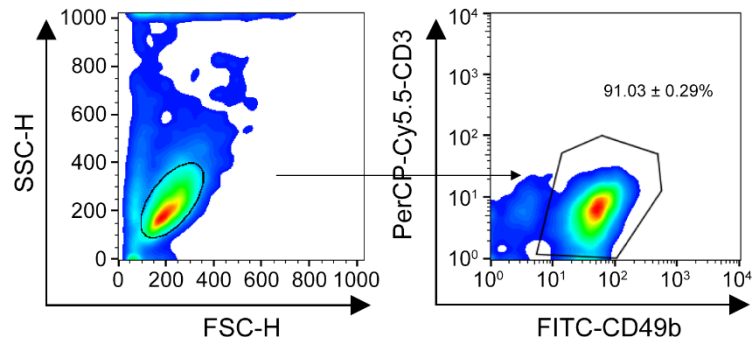

**Figure S3** Flow cytometry analysis of purity of NK cells (gating on CD3<sup>+</sup>CD49b<sup>+</sup> cells) separated from BALB/c mouse spleens and afterwards purified by flow cytometer. Data were expressed as mean  $\pm$  SD ( $n = 3$ ).

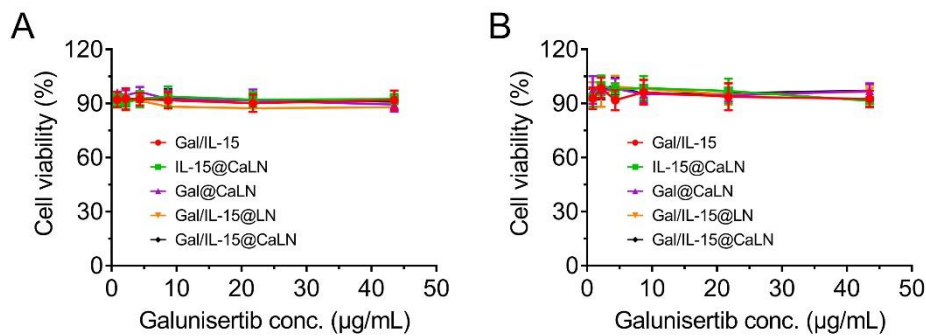

**Figure S4** Cell viability of (A) NK cells and (B) CT26 cells after treated by various treatments. The concentration gradient of galunisertib varied from 0.87 to 43.5  $\mu\text{g/mL}$ , and that of IL-15 was 2–100 ng/mL. Data were expressed as mean  $\pm$  SD ( $n = 6$ ).

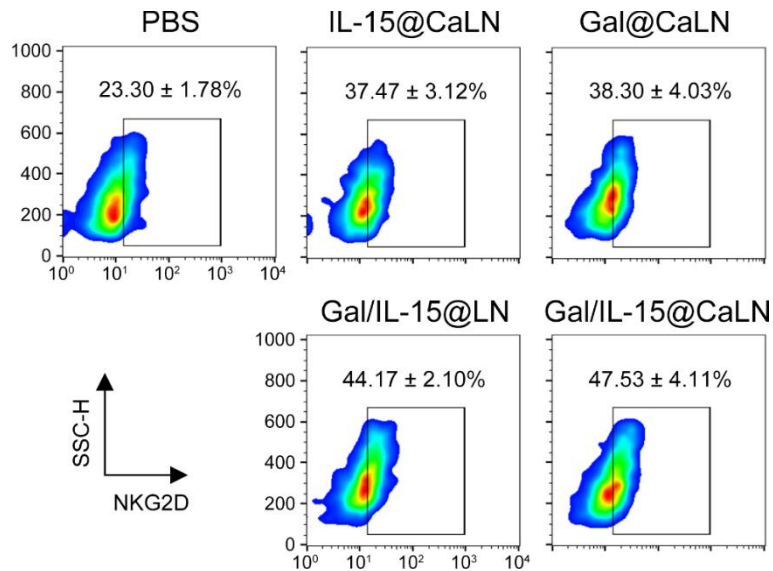

**Figure S5** NKG2D expression in NK cells evaluated by flow cytometry. NK cells ( $2 \times 10^5$ ) were incubated with CT26 cells ( $2 \times 10^5$ ) for 24 h and then treated by various treatments (PBS, IL-15@CaLN, Gal@CaLN, Gal/IL-15@LN, Gal/IL-15@CaLN) at identical 20 ng/mL IL-15 or/and 8.7  $\mu\text{g/mL}$  galunisertib for 12 h, following by staining with anti-NKG2D-APC antibody. Data were expressed as mean  $\pm$  SD ( $n = 3$ ).

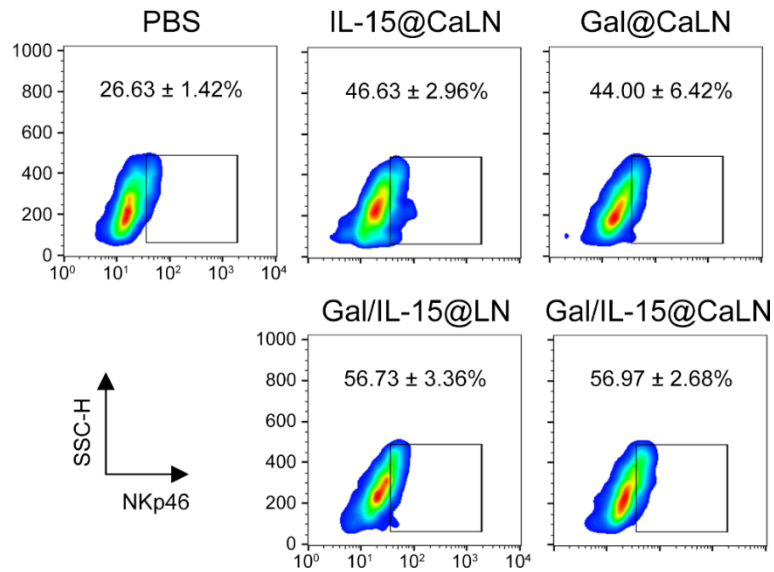

**Figure S6** NKp46 expression in NK cells evaluated by flow cytometry. NK cells ( $2 \times 10^5$ ) were incubated with CT26 cells ( $2 \times 10^5$ ) for 24 h and then treated by various treatments (PBS, IL-15@CaLN, Gal@CaLN, Gal/IL-15@LN, Gal/IL-15@CaLN) at identical 20 ng/mL IL-15 or/and 8.7  $\mu$ g/mL galunisertib for 12 h, followed by staining with anti-NKp46-PE antibody. Data were expressed as mean  $\pm$  SD ( $n = 3$ ).

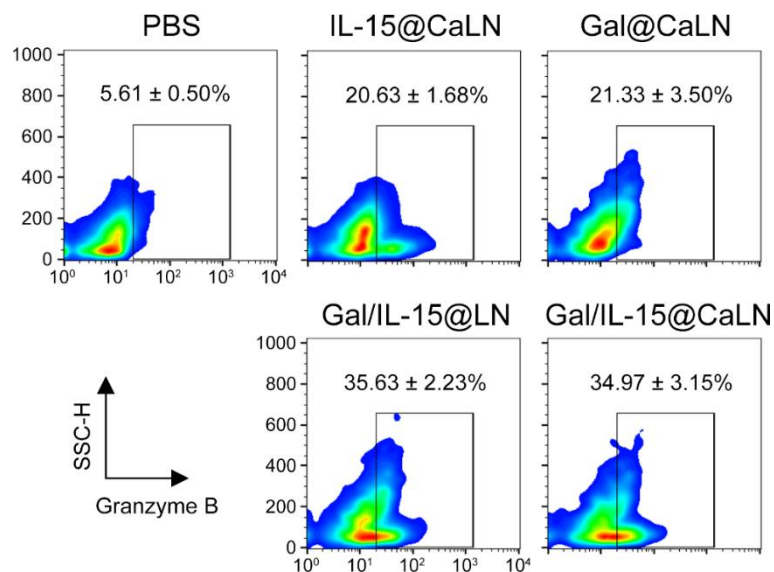

**Figure S7** Granzyme B expression in NK cells evaluated by flow cytometry. NK cells ( $2 \times 10^5$ ) were incubated with CT26 cells ( $2 \times 10^5$ ) for 24 h and then treated by various treatments (PBS, IL-15@CaLN, Gal@CaLN, Gal/IL-15@LN, Gal/IL-15@CaLN) at identical 20 ng/mL IL-15 or/and 8.7  $\mu$ g/mL galunisertib for 12 h, followed by staining with anti-Granzyme B-Alexa Fluor 647 antibody. Data were expressed as mean  $\pm$  SD ( $n = 3$ ).

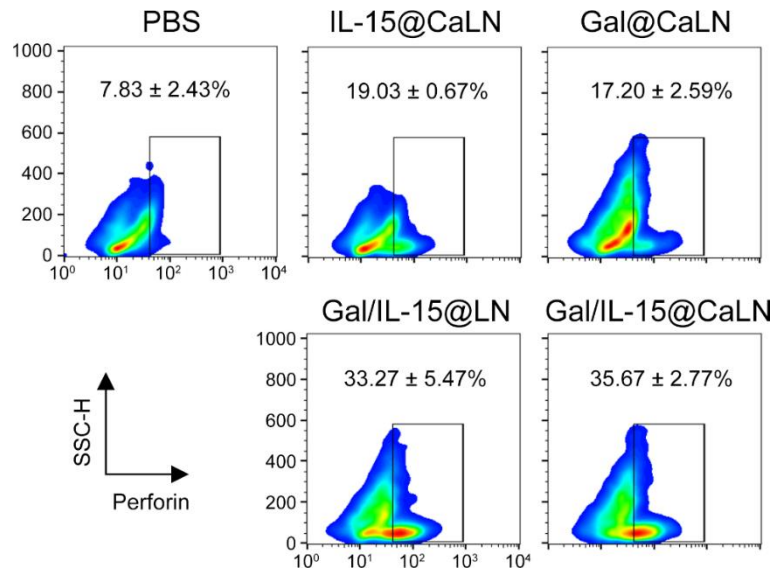

**Figure S8** Perforin expression in NK cells evaluated by flow cytometry. NK cells ( $2 \times 10^5$ ) were incubated with CT26 cells ( $2 \times 10^5$ ) for 24 h and then treated by various treatments (PBS, IL-15@CaLN, Gal@CaLN, Gal/IL-15@LN, Gal/IL-15@CaLN) at identical 20 ng/mL IL-15 or/and 8.7  $\mu$ g/mL galunisertib for 12 h, followed by staining with anti-Perforin-PE antibody. Data were expressed as mean  $\pm$  SD ( $n = 3$ ).

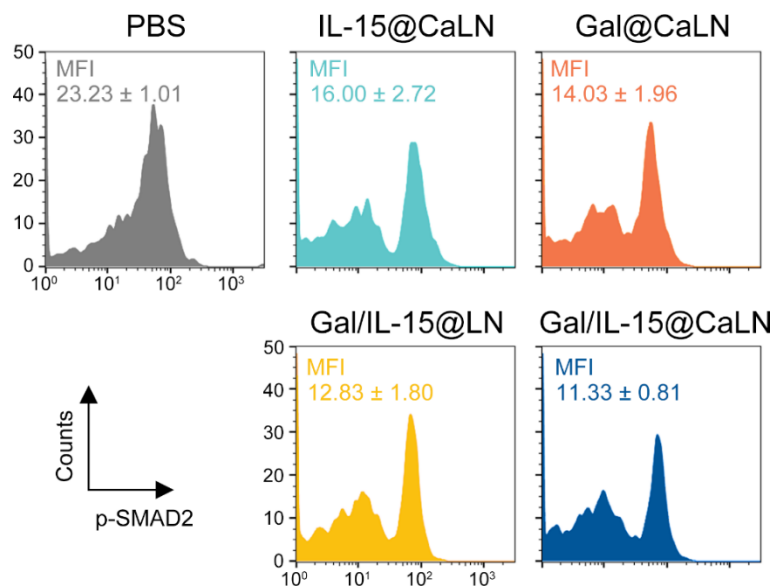

**Figure S9** p-SMAD2 expression in NK cells evaluated by flow cytometry. NK cells ( $2 \times 10^5$ ) were incubated with CT26 cells ( $2 \times 10^5$ ) for 24 h and then treated by various treatments (PBS, IL-15@CaLN, Gal@CaLN, Gal/IL-15@LN, Gal/IL-15@CaLN) at identical 20 ng/mL IL-15 or/and 8.7  $\mu$ g/mL galunisertib for 12 h, followed by staining with anti-p-SMAD2 primary antibody and corresponding PE-conjugated secondary antibody. Data were expressed as mean  $\pm$  SD ( $n = 3$ ).

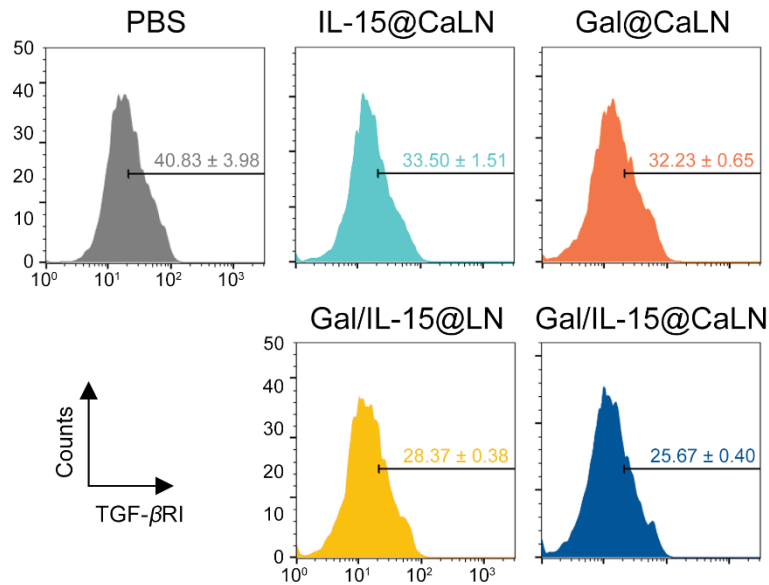

**Figure S10** TGF- $\beta$ RI expression in NK cells evaluated by flow cytometry. NK cells ( $2 \times 10^5$ ) were incubated with CT26 cells ( $2 \times 10^5$ ) for 24 h and then treated by various treatments (PBS, IL-15@CaLN, Gal@CaLN, Gal/IL-15@LN, Gal/IL-15@CaLN) at identical 20 ng/mL IL-15 or/and 8.7  $\mu$ g/mL galunisertib for 12 h, followed by staining with anti-TGF- $\beta$ RI primary antibody and corresponding PE-conjugated secondary antibody. Data were expressed as mean  $\pm$  SD ( $n = 3$ ).

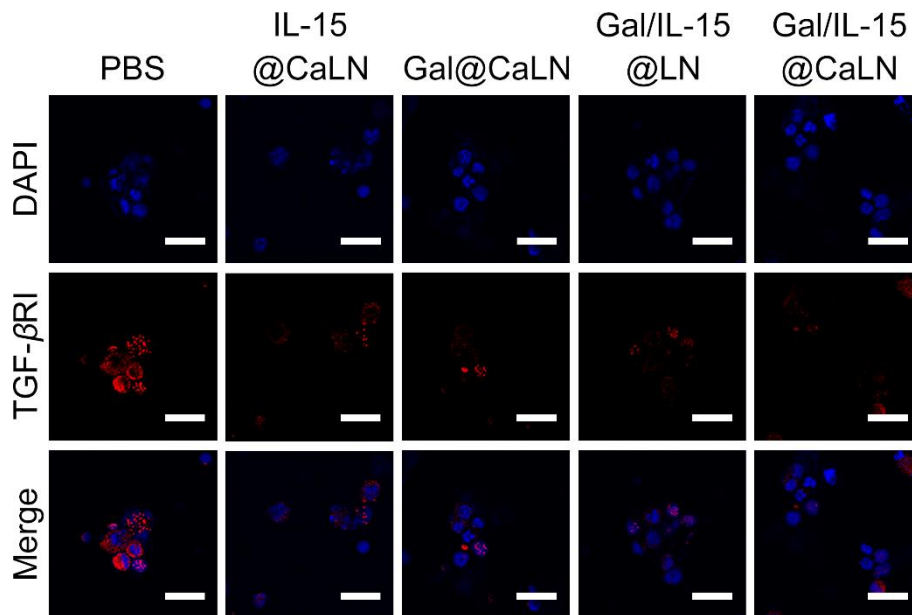

**Figure S11** TGF- $\beta$ RI expression in NK cells evaluated by CLSM. NK cells ( $2 \times 10^5$ ) were incubated with CT26 cells ( $2 \times 10^5$ ) for 24 h and then treated by various treatments (PBS, IL-15@CaLN, Gal@CaLN, Gal/IL-15@LN, Gal/IL-15@CaLN) at identical 20 ng/mL IL-15 or/and 8.7  $\mu$ g/mL galunisertib for 12 h, followed by staining with anti-TGF- $\beta$ RI primary antibody and corresponding Alexa Fluor 647-conjugated secondary antibody (Blue signals: DAPI; red signals: TGF- $\beta$ RI). Scale bar, 25  $\mu$ m.

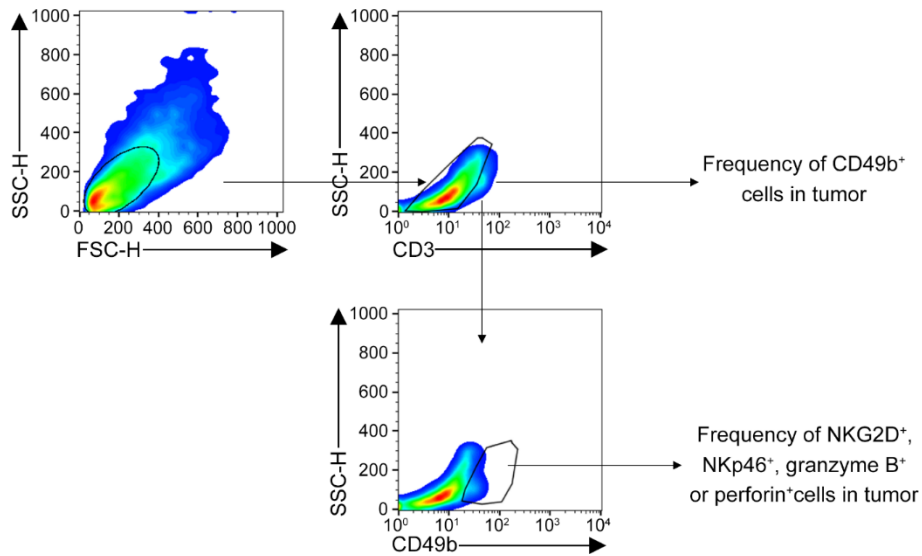

**Figure S12** Gating strategies for identification of intratumoral NK cells (gating on CD3<sup>-</sup>CD49b<sup>+</sup> cells), NKG2D<sup>+</sup> NK cells (gating on CD3<sup>-</sup>CD49b<sup>+</sup>NKG2D<sup>+</sup> cells), NKp46<sup>+</sup> NK cells (gating on CD3<sup>-</sup>CD49b<sup>+</sup>NKp46<sup>+</sup> cells), Granzyme B<sup>+</sup> NK cells (gating on CD3<sup>-</sup>CD49b<sup>+</sup>Granzyme B<sup>+</sup> cells), and Perforin<sup>+</sup> NK cells (gating on CD3<sup>-</sup>CD49b<sup>+</sup>Perforin<sup>+</sup> cells) in CT26 tumor-bearing immune-deficient BALB/c-nu mice.

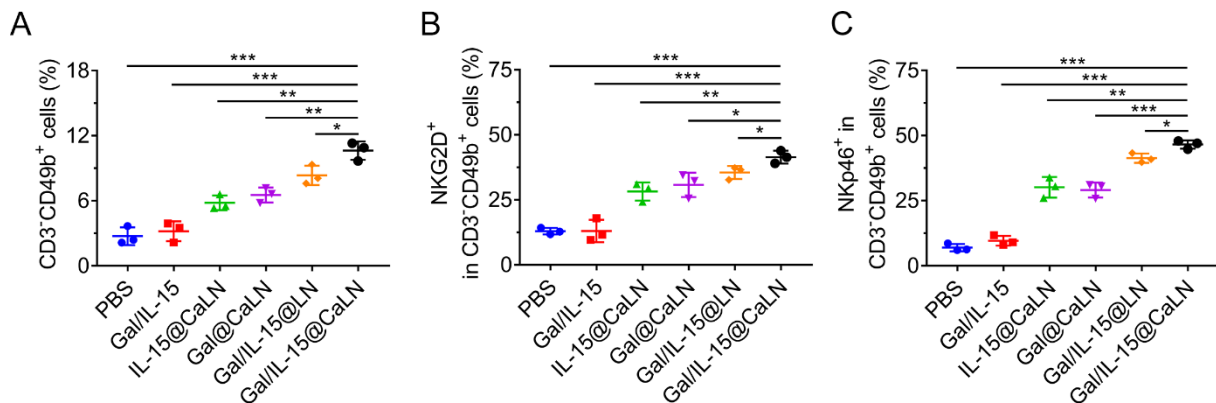

**Figure S13** Frequency of intratumoral NK cell populations in CT26 tumor-bearing BALB/c-nu mice. (A) Frequency of NK cells (gating on CD3<sup>-</sup>CD49b<sup>+</sup> cells). (B) Frequency of NKG2D<sup>+</sup> NK cells (gating on CD3<sup>-</sup>CD49b<sup>+</sup>NKG2D<sup>+</sup> cells). (C) Frequency of NKp46<sup>+</sup> NK cells (gating on CD3<sup>-</sup>CD49b<sup>+</sup>NKp46<sup>+</sup> cells). Data were expressed as mean  $\pm$  SD. The statistical significance was displayed by two-sided unpaired Student's *t*-test. (\* $P < 0.05$ , \*\* $P < 0.01$ , \*\*\* $P < 0.001$ ) ( $n = 3$ ).



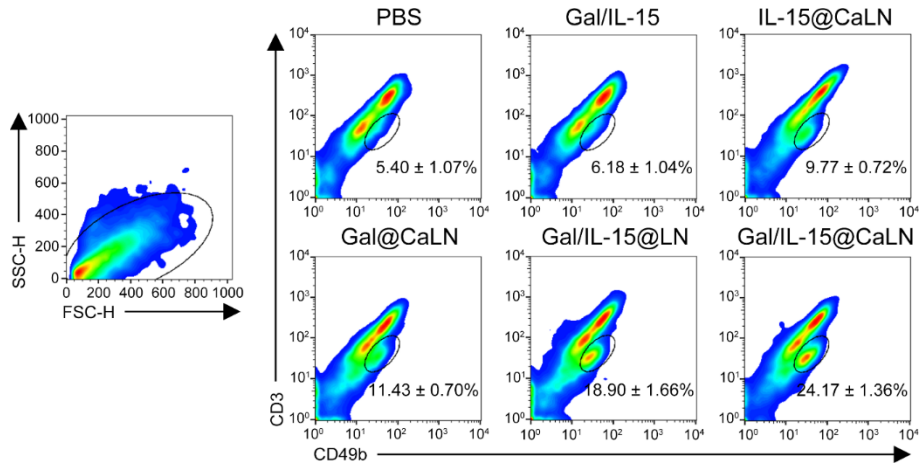

**Figure S14** Gating strategies and frequency of intratumoral NK cell populations (gating on CD3<sup>+</sup>CD49b<sup>+</sup> cells) in CT26 tumor-bearing BALB/c-ic mice. Data were expressed as mean ± SD ( $n = 3$ ).

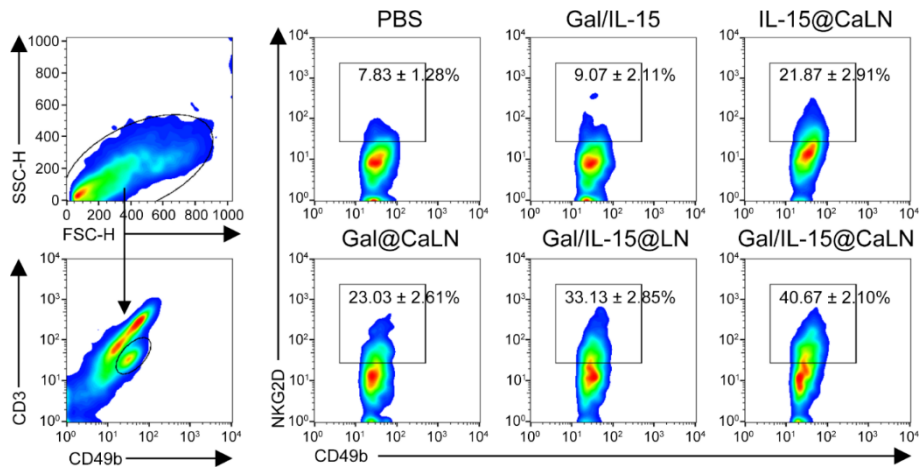

**Figure S15** Gating strategies and frequency of intratumoral NKG2D<sup>+</sup> NK cell populations (gating on CD3<sup>+</sup>CD49b<sup>+</sup>NKG2D<sup>+</sup> cells) in CT26 tumor-bearing BALB/c-ic mice. Data were expressed as mean ± SD ( $n = 3$ ).

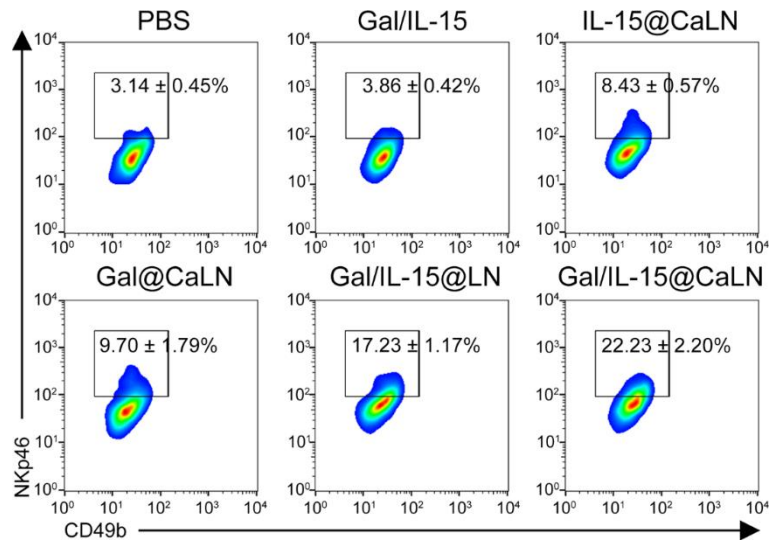

**Figure S16** Frequency of intratumoral NKp46<sup>+</sup> NK cell populations (gating on CD3<sup>-</sup>CD49b<sup>+</sup>NKp46<sup>+</sup> cells) in CT26 tumor-bearing BALB/c-ic mice. Data were expressed as mean ± SD ( $n = 3$ ).

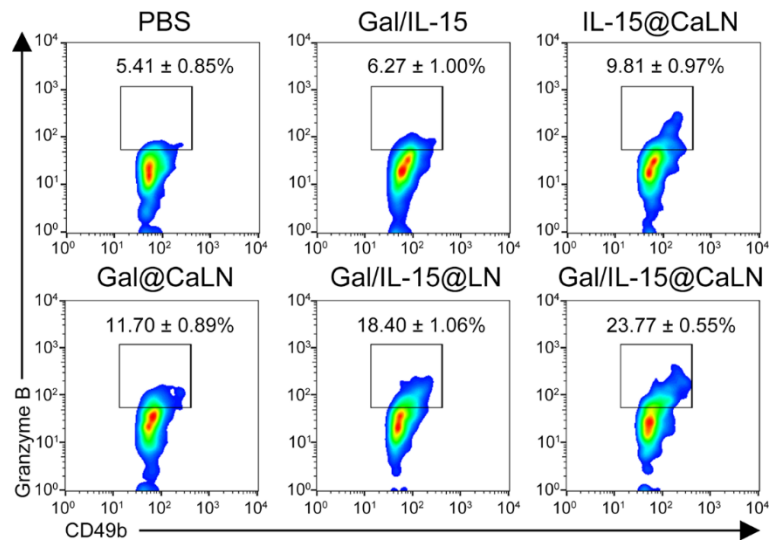

**Figure S17** Frequency of intratumoral Granzyme B<sup>+</sup> NK cell populations (gating on CD3<sup>-</sup>CD49b<sup>+</sup>Granzyme B<sup>+</sup> cells) in CT26 tumor-bearing BALB/c-ic mice. Data were expressed as mean ± SD ( $n = 3$ ).

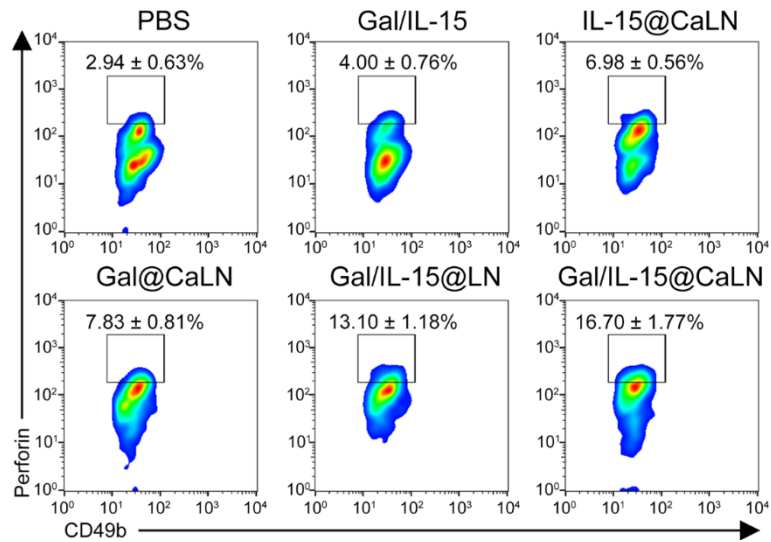

**Figure S18** Frequency of intratumoral Perforin<sup>+</sup> NK cell populations (gating on CD3<sup>-</sup>CD49b<sup>+</sup>Perforin<sup>+</sup> cells) in CT26 tumor-bearing BALB/c-ic mice. Data were expressed as mean ± SD ( $n = 3$ ).

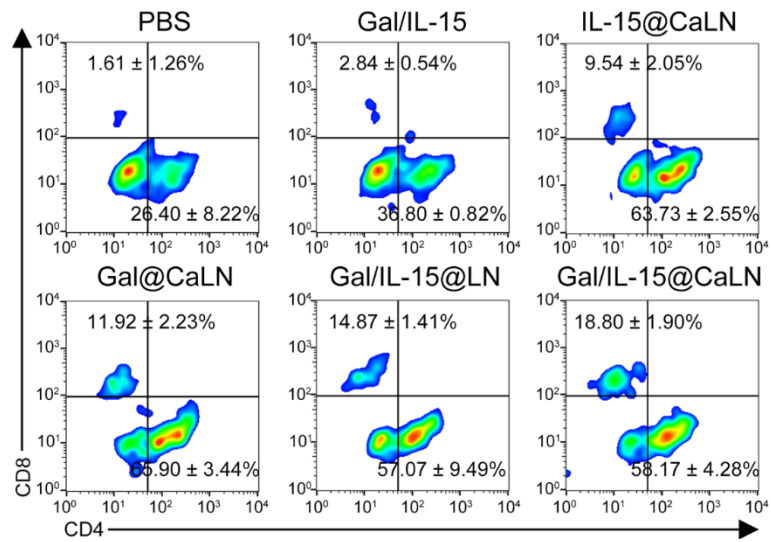

**Figure S19** Frequency of intratumoral CD8<sup>+</sup> T cell (gating on CD3<sup>+</sup>CD8<sup>+</sup> cells) and CD4<sup>+</sup> T cell populations (gating on CD3<sup>+</sup>CD4<sup>+</sup> cells) in CT26 tumor-bearing BALB/c-ic mice. Data were expressed as mean ± SD ( $n = 3$ ).

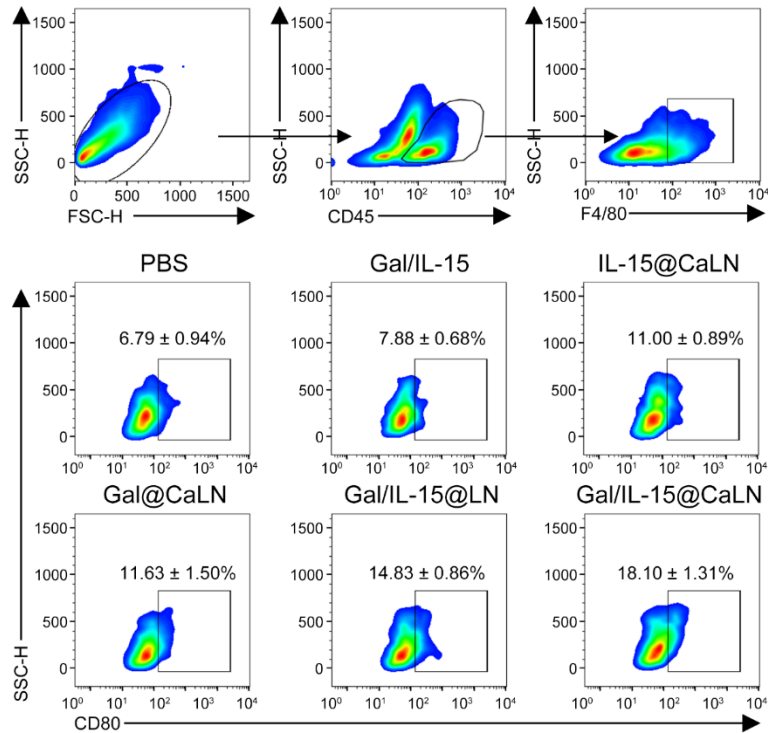

**Figure S20** Gating strategies and frequency of intratumoral M1 macrophage populations (gating on CD45<sup>+</sup>F4/80<sup>+</sup>CD80<sup>+</sup> cells) in CT26 tumor-bearing BALB/c-ic mice. Data were expressed as mean ± SD ( $n = 3$ ).

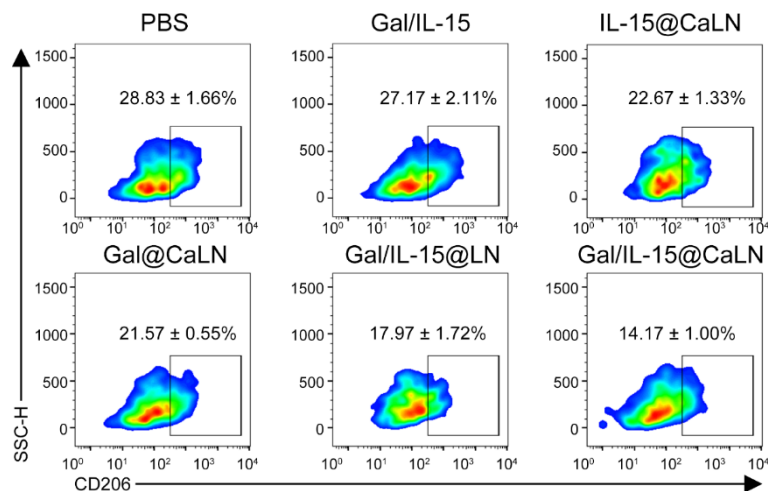

**Figure S21** Frequency of intratumoral M2 macrophage populations (gating on CD45<sup>+</sup>F4/80<sup>+</sup>CD206<sup>+</sup> cells) in CT26 tumor-bearing BALB/c-ic mice. Data were expressed as mean ± SD ( $n = 3$ ).

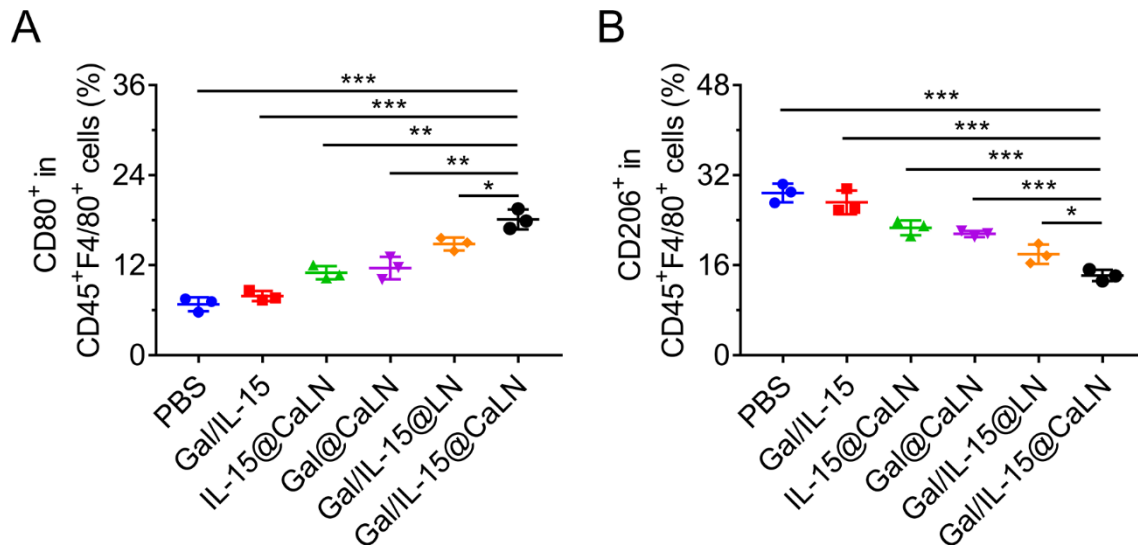

**Figure S22** Frequency of intratumoral macrophage populations in CT26 tumor-bearing BALB/c-ic mice. (A) Frequency of M1 macrophage populations (gating on CD45<sup>+</sup>F4/80<sup>+</sup>CD80<sup>+</sup> cells). (B) Frequency of M2 macrophage populations (gating on CD45<sup>+</sup>F4/80<sup>+</sup>CD206<sup>+</sup> cells). Data were expressed as mean  $\pm$  SD ( $n = 3$ ). The statistical significance was displayed by two-sided unpaired Student's *t*-test. (\* $P < 0.05$ , \*\* $P < 0.01$ , \*\*\* $P < 0.001$ ).

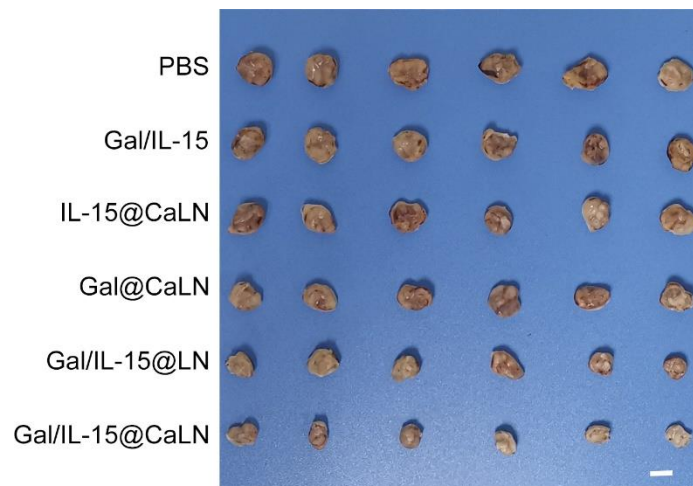

**Figure S23** Photographs of tumors at Day 14 of antitumor study in CT26 tumor-bearing BALB/c-nu mice ( $n = 6$ ). Scale bar, 1 cm.



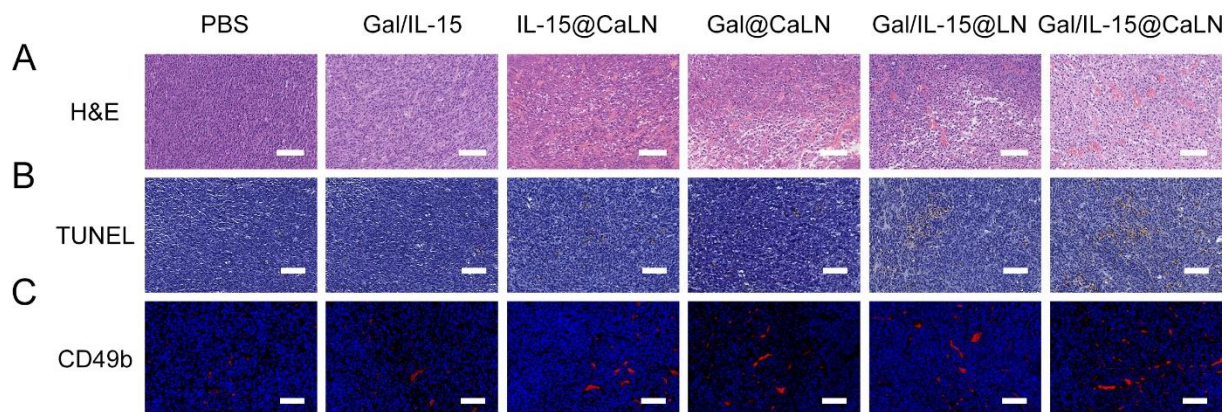

**Figure S24** Tumor section assays at Day 14 of antitumor study in CT26 tumor-bearing BALB/c-nu mice. (A) H&E staining. (B) TUNEL staining. (C) The infiltration of NK cells characterized as CD49b<sup>+</sup> cells (Blue signals: DAPI; red signals: CD49b). Scale bar, 100  $\mu$ m.

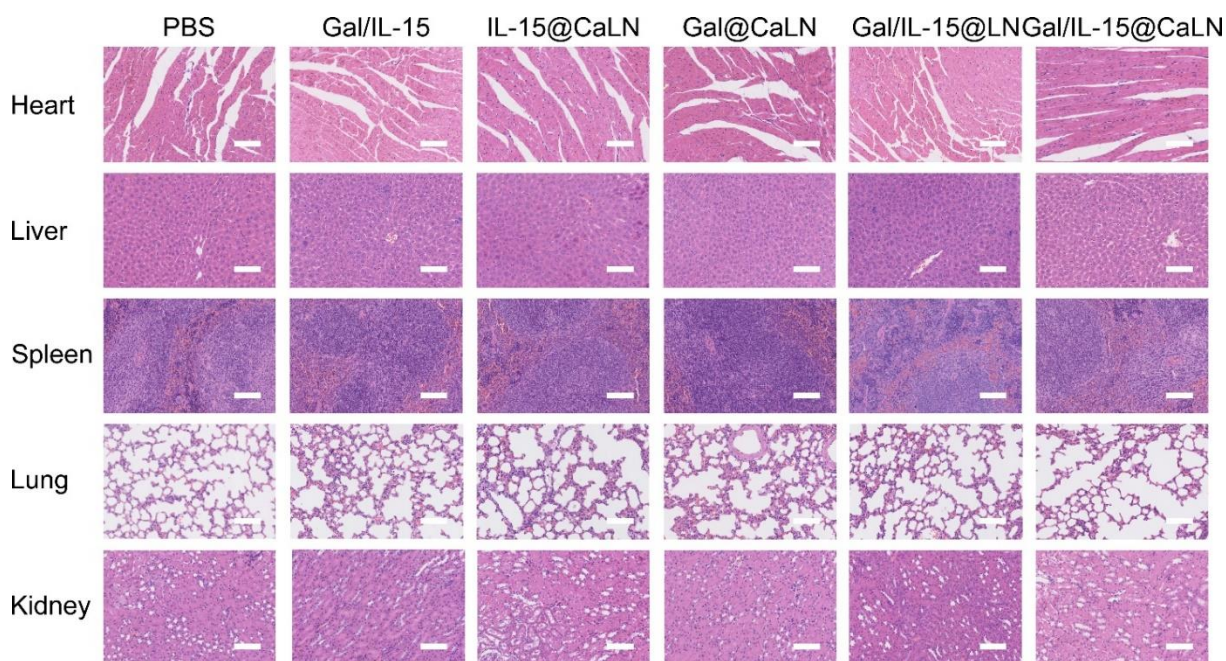

**Figure S25** H&E staining of major organs (heart, liver, spleen, lung, kidney) at Day 14 of antitumor study in CT26 tumor-bearing BALB/c-nu mice. Scale bar, 100  $\mu$ m.

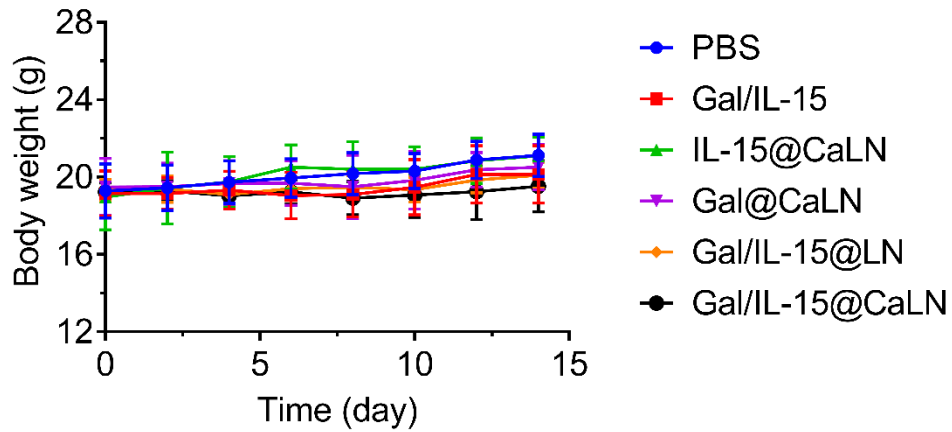

**Figure S26** Body weight change monitored every two days during the antitumor study in CT26 tumor-bearing BALB/c-nu mice. Data were expressed as mean  $\pm$  SD ( $n = 6$ ).

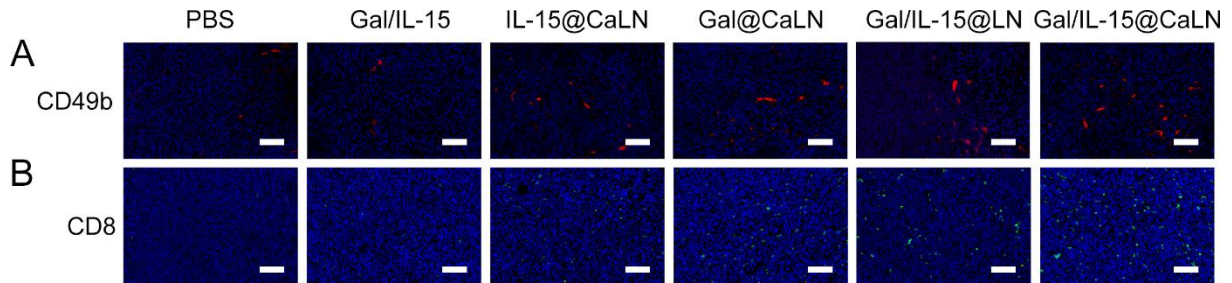

**Figure S27** Immunofluorescence staining of tumor sections at Day 16 of antitumor study in CT26 tumor-bearing BALB/c-ic mice. (A) The infiltration of NK cells characterized as CD49b<sup>+</sup> cells (Blue signals: DAPI; red signals: CD49b). (B) The infiltration of CD8<sup>+</sup> T cells characterized as CD8<sup>+</sup> cells (Blue signals: DAPI; green signals: CD8). Scale bar, 100  $\mu$ m.



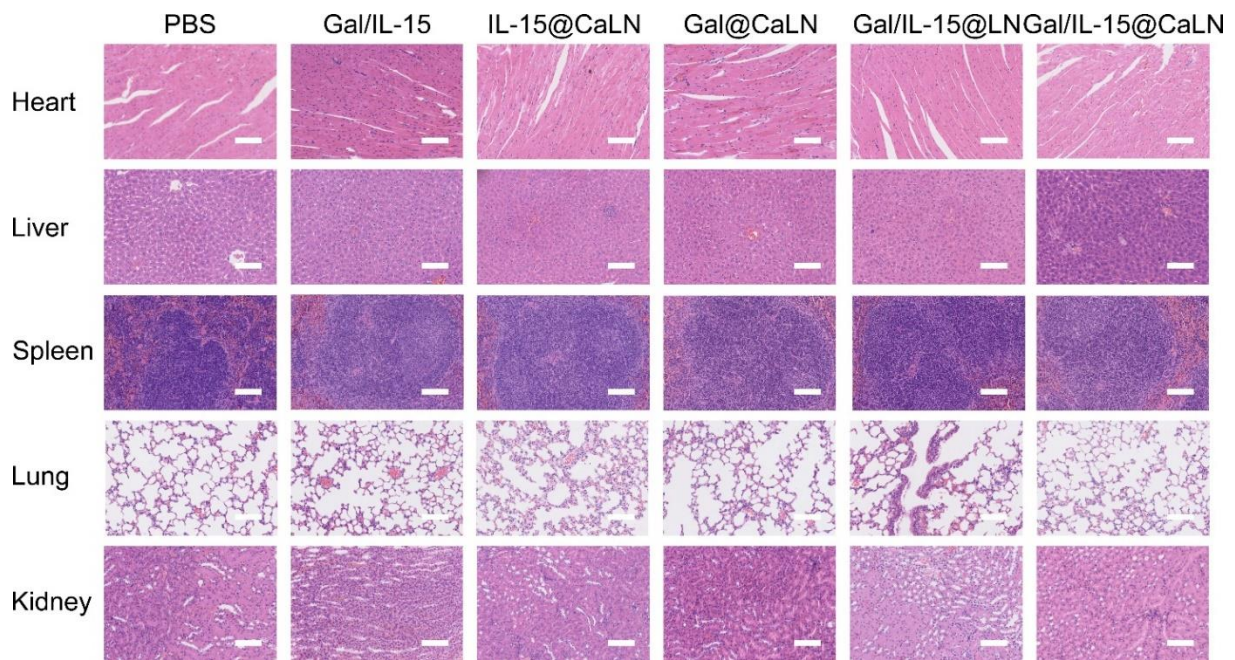

**Figure S28** H&E staining of major organs (heart, liver, spleen, lung, kidney) at Day 16 of antitumor study in CT26 tumor-bearing BALB/c-ic mice. Scale bar, 100  $\mu$ m.

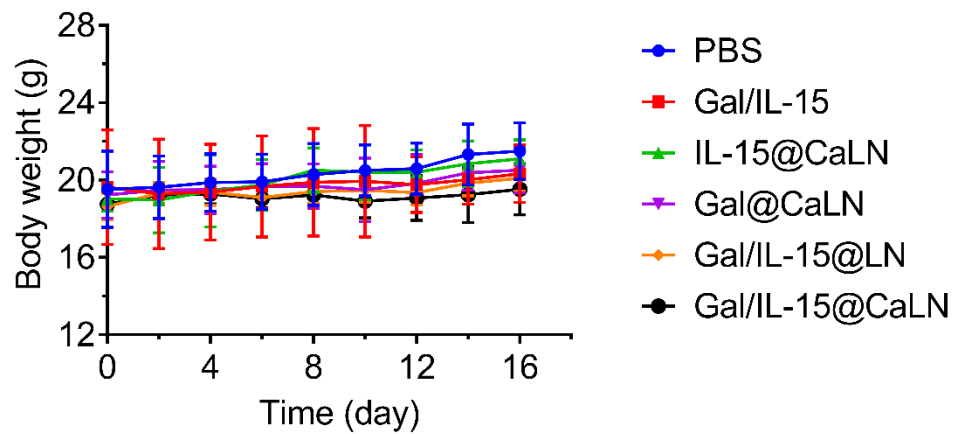

**Figure S29** Body weight change monitored every two days during the antitumor study in CT26 tumor-bearing BALB/c-ic mice. Data were expressed as mean  $\pm$  SD ( $n = 6$ ).
